# Supplementary material for: Fabrication of one dimensional superfine polymer fibers by double-spinning
Source: Royal Society of Chemistry journal article supplement (doi:10.1039/c1jm12240a), 2011-01-01
Supplement: c1jm12240a.pdf [file c1jm12240a.pdf]

## Electronic Supplementary Information

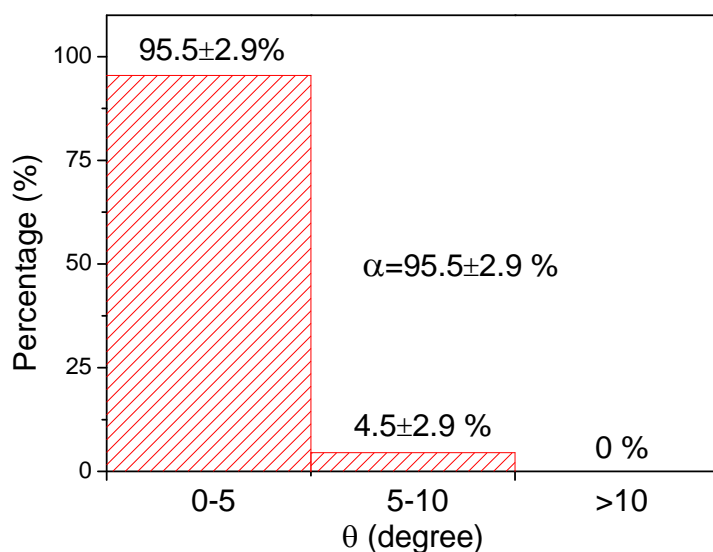

**Fig. S1** Distributions of the degree of alignment ( $\theta$ ) defined by the difference between the angles of orientation ( $\phi$ ) of fibers and the long axis. Experimental parameters are: PS concentration 18%, voltage 2.8 kV, rotating speed 390 rpm, work distance 5 cm, work radius 16 cm, and DS time 4 min. The angles were measured on an Image-Pro Plus instrument.

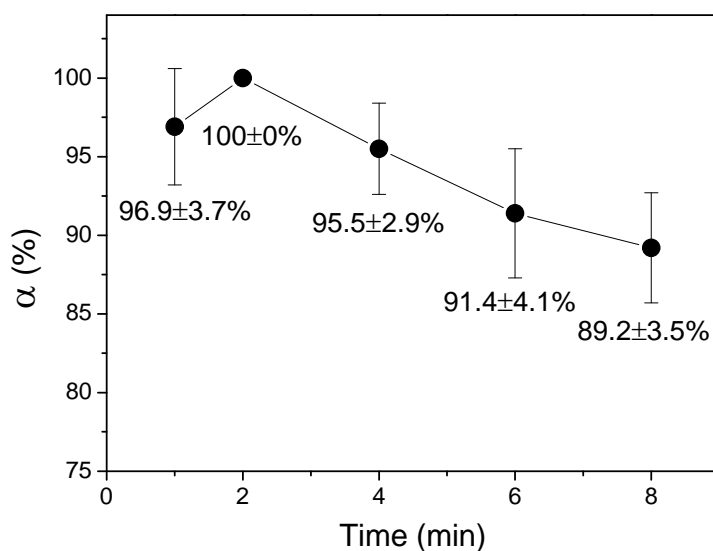

**Fig. S2** Spinning time versus  $\alpha$  (the percentage of fibers with  $\theta < 5^\circ$ ). The angles were measured on an Image-Pro Plus instrument.

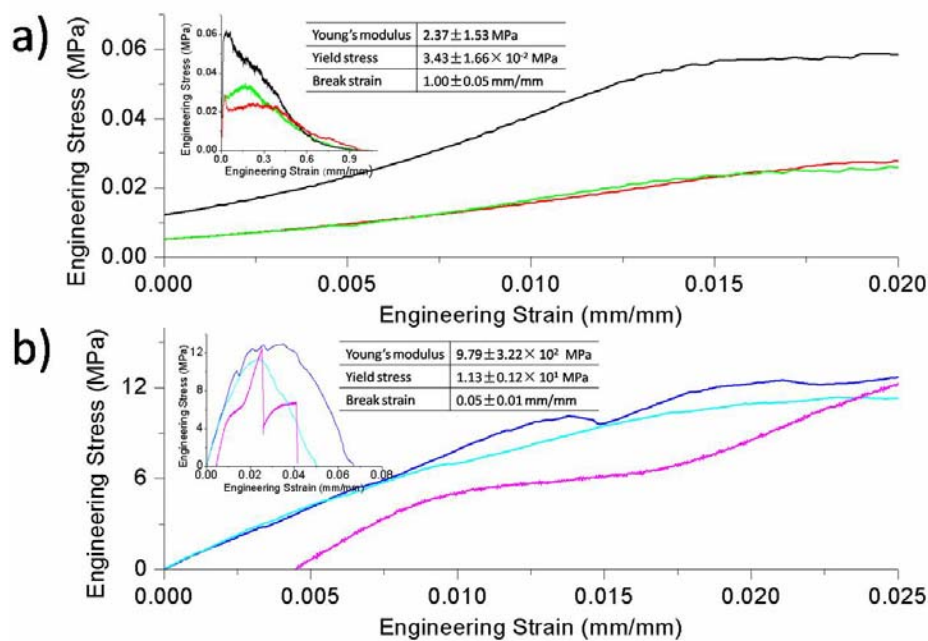

**Fig. S3** Stress-Strain curves of DS nonwoven mats (a, three specimens) and aligned fibrous arrays (b, three specimens). The inset figures show the entire data. The deformation speeds are 1 and 0.2  $\mu\text{m/s}$  for nonwoven mats and aligned fibrous arrays, respectively. The measurements were carried out by the Agilent T150 UTM.

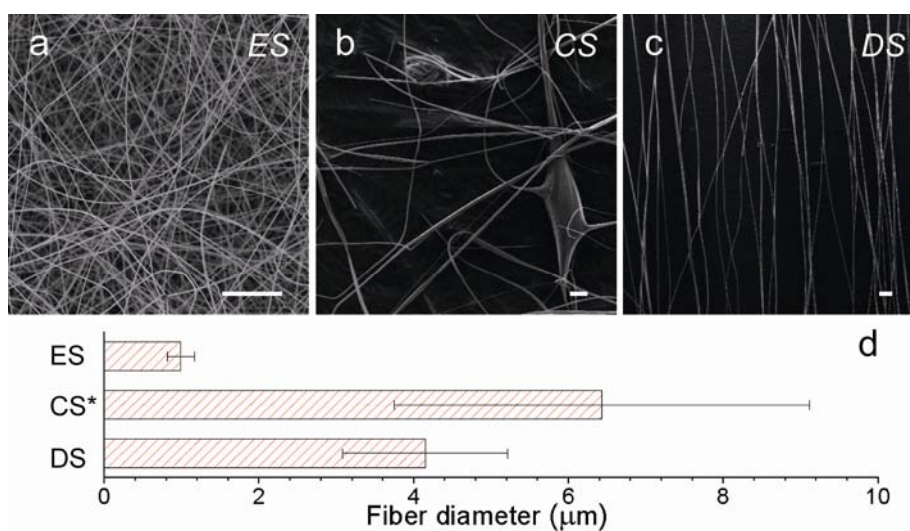

**Fig. S4** SEM images of as-spun PMMA fibers fabricated by a) ES, b) CS, and c) DS. Scale bars are 50  $\mu\text{m}$ . d) The average diameters of the fibers spun by three methods. \*Do not include the size of the bead structures among CS fibers.

**Table S1** Influence of the polymer concentration on the morphologies of the DS fibers.

| PS concentration | 6%                                                                                | 12%                                                                               | 18%                                                                                | 24%             |
|------------------|-----------------------------------------------------------------------------------|-----------------------------------------------------------------------------------|------------------------------------------------------------------------------------|-----------------|
| Result           | Microspheres and beaded fibers                                                    | Non-uniform fibers                                                                | Aligned uniform fibers                                                             | Spinning failed |
| Morphology       | 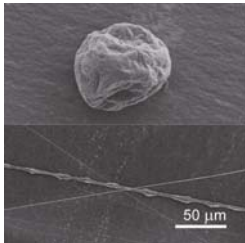 |  |  |                 |

Note: Other parameters are the same: voltage 2.8 kV, rotating speed 360-390 rpm, work distance 5 cm, work radius 16 cm.

**Table S2** DS PVP fibers fabricated with different solvents.

| Solvent | Ethanol                | H <sub>2</sub> O |
|---------|------------------------|------------------|
| Result  | Aligned fibrous arrays | No fibers formed |

Note: Other parameters are the same: PVP concentration 10%, voltage 5 kV, rotating speed 360 rpm, work distance 5 cm, work radius 16 cm.
